# Supplementary material
Source: publisher figshare collection journal article supplement (https://acs.figshare.com/ndownloader/files/13398167)
Supplement: Supplementary file 1 [file 13398167]

Compound	SMILE	Residual SOCE activity (% of Ctrl)	IC50 (10 µM)
1H	O=C(C1=C(C(F)(F)F)N(C2=CC=C(N3N=NC(C4=CC=CC(N)=C4)=C3)C=C2)N=C1)OCC	81.7 ± 12.1	ND
1N	O=C(C1=C(C(F)(F)F)N(C2=CC=C(N3N=NC(C4=CC=C(O)C(OC)=C4)=C3)C=C2)N=C1)OCC	43.2 ± 3.7	ND
1S	O=C(O)C1=CC=CC(C2=CN(C3=CC=C(N4N=CC(C(OCC)=O)=C4C(F)(F)F)C=C3)N=N2)=C1	9.8 ± 0.5	0.6 ± 0.1
1T	O=C(O)C1=CC=C(C2=CN(C3=CC=C(N4N=CC(C(OCC)=O)=C4C(F)(F)F)C=C3)N=N2)C=C1	52.1 ± 4.2	ND
2S	O=C(O)C1=CC=CC(C2=CN(C3=CC=C(N4N=C(C(F)(F)F)C=C4C(F)(F)F)C=C3)N=N2)=C1	53.0 ± 8.7	ND
2T	O=C(O)C1=CC=C(C2=CN(C3=CC=C(N4N=C(C(F)(F)F)C=C4C(F)(F)F)C=C3)N=N2)C=C1	213.0 ± 0.8	ND
3D	O=C(O)CCCN1N=NC(C2=CC=C(N3N=CC(C(OCC)=O)=C3C(F)(F)F)C=C2)=C1	95.5 ± 10.1	ND
3G	O=C(C1=C(C(F)(F)F)N(C2=CC=C(C3=CN(C4=CC=C(Cl)C=C4)N=N3)C=C2)N=C1)OCC	141.6 ± 1.5	ND
3H	O=C(C1=C(C(F)(F)F)N(C2=CC=C(C3=CN(C4=CC=CC(N)=C4)N=N3)C=C2)N=C1)OCC	73.2 ± 3.3	ND
3J	O=C(C1=C(C(F)(F)F)N(C2=CC=C(C3=CN(C4=C(F)C=NC=C4)N=N3)C=C2)N=C1)OCC	81.4 ± 9.2	ND
3S	O=C(O)C1=CC=CC(N2N=NC(C3=CC=C(N4N=CC(C(OCC)=O)=C4C(F)(F)F)C=C3)=C2)=C1	30.0 ± 6.0	ND
3T	O=C(O)C1=CC=C(N2N=NC(C3=CC=C(N4N=CC(C(OCC)=O)=C4C(F)(F)F)C=C3)=C2)C=C1	69.3 ± 10.0	ND
19	O=C(O)C1=CC=CC(NC(C2=CC=C(N3N=CC(C(OCC)=O)=C3C(F)(F)F)C=C2)=O)=C1	> 90%	ND
22	O=C(O)C1=CC=CC(C(NC2=CC=C(N3N=CC(C(OCC)=O)=C3C(F)(F)F)C=C2)=O)=C1	63.5 ± 3.2	ND
23	O=C(O)C1=CC=CC(C2=CN=NN2C3=CC=C(N4N=CC(C(OCC)=O)=C4C(F)(F)F)C=C3)=C1	> 90%	ND
30	O=C(O)C1=CC=CC(C2=CN(C3=CC=C(N4N=CC(C(OC)=O)=C4C(F)(F)F)C=C3)N=N2)=C1	7.9 ± 1.8	ND
31	O=C(O)C1=CC=CC(C2=CN(C3=CC=C(N4N=CC(C(OC(C)C)=O)=C4C(F)(F)F)C=C3)N=N2)=C1	3.5 ± 0.3	3.1 ± 1.3
39	O=C(O)C1=CC=CC(C2=CN(C3=CC=C(N4N=CC(C(OC(CCC)C)=O)=C4C(F)(F)F)C=C3)N=N2)=C1	17.5 ± 1.6	4.4 ± 1.2
40	O=C(O)C1=CC=CC(C2=CN(C3=CC=C(N4N=CC(C(OCCC(C)C)=O)=C4C(F)(F)F)C=C3)N=N2)=C1	> 90%	ND
41	O=C(O)C1=CC=CC(C2=CN(C3=CC=C(N4N=CC(C(OC/C=C(C)/CC/C=C(C)\C)=O)=C4C(F)(F)F)C=C3)N=N2)=C1	> 90%	ND
42	O=C(O)C1=CC=CC(C2=CN(C3=CC=C(N4N=CC(C(OCC5=CC=NC=C5)=O)=C4C(F)(F)F)C=C3)N=N2)=C1	> 90%	ND
43	O=C(O)C1=CC=CC(C2=CN(C3=CC=C(N4N=CC(C(OCC5=CC=CC=C5)=O)=C4C(F)(F)F)C=C3)N=N2)=C1	10.5 ± 1.4	ND
44	O=C(O)C1=CC=CC(C2=CN(C3=CC=C(N4N=CC(C(OCCN5CCOCC5)=O)=C4C(F)(F)F)C=C3)N=N2)=C1	> 90%	ND
46	O=C(O)C1=CC=CC(C2=CN(C3=CC=C(N4N=CC(CO)=C4C(F)(F)F)C=C3)N=N2)=C1	> 90%	ND
48	O=C(O)C1=CC=CC(C2=CN(C3=CC=C(N4N=CC(C(NC(C)C)=O)=C4C(F)(F)F)C=C3)N=N2)=C1	> 90%	ND
49	O=C(O)C1=CC=CC(C2=CN(C3=CC=C(N4N=CC(C(N)=O)=C4C(F)(F)F)C=C3)N=N2)=C1	> 90%	ND
50	O=C(C1=C(C(F)(F)F)N(C2=CC=C(N3N=NC(C4=CC=CC(C(O)=O)=C4)=C3)C=C2)N=C1)O	> 90%	ND
51	O=C(C1=C(C(F)(F)F)N(C2=CC=C(N3N=NC(C4=CC=CC(C(NS(=O)(C)=O)=O)=C4)=C3)C=C2)N=C1)OCC	> 90%	ND
58	O=C(C1=C(C(F)(F)F)N(C2=CC=C(N3N=NC(C4=CC=CC(C(OC)=O)=C4)=C3)C=C2)N=C1)OCC	> 90%	ND
59	O=C(C1=C(C(F)(F)F)N(C2=CC=C(C3=CN(C4=CC=CC(C(C)=O)=C4)N=N3)C=C2)N=C1)OCC	> 90%	ND
60	O=C(C1=C(C(F)(F)F)N(C2=CC=C(N3N=NC(C4=CC=CC(C(N)=O)=C4)=C3)C=C2)N=C1)OCC	72.1 ± 2.5	ND
61	O=C(C1=C(C(F)(F)F)N(C2=CC=C(C3=CN(C4=CC=CC(CO)=C4)N=N3)C=C2)N=C1)OCC	> 90%	ND
62	O=C(C1=C(C(F)(F)F)N(C2=CC=C(N3N=NC(C4=CC=CC(S(=O)(N)=O)=C4)=C3)C=C2)N=C1)OCC	83.6 ± 4.1	ND
63	O=C(C1=C(C(F)(F)F)N(C2=CC=C(N3N=NC(C4=CC=CC(C(NO)=O)=C4)=C3)C=C2)N=C1)OCC	6.4 ± 5.7	ND
